# Supplementary material for: Damage factors of stratospheric ozone depletion on human health impact with the addition of nitrous oxide as the largest contributor in the 2000s
Source: Springer Nature journal article supplement (doi:10.1007/s11367-023-02174-w), 2023-04-29
Supplement: MOESM1 [file 25303296]

## Sheet: Table S1
Supplementary data for
Damage factors of stratospheric ozone depletion on human health impact with the addition of nitrous oxide as the largest contributor in the 2000s
Kentaro Hayashi1,2, Norihiro Itsubo3,4
1 Research Institute for Humanity and Nature (RIHN), Kyoto, Japan
2 Institute for Agro-Environmental Sciences, National Agriculture and Food Research Organization, Tsukuba, Japan
3 Waseda University, Tokyo, Japan
4 Tokyo City University, Yokohama, Japan
International Journal of Life Cycle Assessment
Table S1 Damage factors of stratospheric ozone depletion per unit emission.
ODS in the Montreal Protocol
Annex	Group	Remarks
A	I	CFCs
	II	Halons
B	I	Other fully halogenated CFCs
	II	Carbon tetrachloride
	III	1,1,1-trichloroethane
C	I	HCFCs
	II	HBFCs
	III	Bromochloromethane
E	I	Methylbromide
Annex	Group	Chemical formula	Substance name	ODP				Reference substance	ODP ratio	Damage factor per unit emission
										Unit	Year of 2010					Year of 2015
							Avg.				Melanoma	Non-melanoma	Skin cancer total	Eye cataract	Total	Melanoma	Non-melanoma	Skin cancer total	Eye cataract	Total
A	I	CFCl3	CFC-11	1				-		DALY kg-1	9.48896e-05	0.000172084	0.000266974	0.000607007	0.00087398	9.30563e-05	0.000172786	0.000265842	0.000656499	0.000922342
		CF2Cl2	CFC-12	1				-		DALY kg-1	8.69881e-05	0.000157754	0.000244742	0.000556499	0.000801241	8.53075e-05	0.000158397	0.000243705	0.000601874	0.000845579
		C2F3Cl3	CFC-113	0.8				-		DALY kg-1	9.56947e-05	0.000173544	0.000269238	0.000612192	0.00088143	9.3846e-05	0.000174252	0.000268098	0.000662108	0.000930205
		C2F4Cl2	CFC-114	1				CFC-11	1	DALY kg-1	9.48896e-05	0.000172084	0.000266974	0.000607007	0.00087398	9.30563e-05	0.000172786	0.000265842	0.000656499	0.000922342
		C2F5Cl	CFC-115	0.6				CFC-11	0.6	DALY kg-1	5.69337e-05	0.00010325	0.000160184	0.000364204	0.000524388	5.58338e-05	0.000103672	0.000159505	0.0003939	0.000553405
	II	CF2BrCl	Halon-1211	3				-		DALY kg-1	0.000321922	0.000583859	0.000905781	0.00205641	0.00296219	0.000315696	0.000586231	0.000901927	0.002224	0.00312593
		CF3Br	Halon-1301	10				-		DALY kg-1	0.00131905	0.00239227	0.00371132	0.00842873	0.01214	0.00129354	0.002402	0.00369554	0.00911572	0.0128113
		C2F4Br2	Halon-2402	6				Halon-1211	2	DALY kg-1	0.000643844	0.00116772	0.00181156	0.00411282	0.00592438	0.000631392	0.00117246	0.00180385	0.004448	0.00625186
B	I	CF3Cl	CFC-13	1				CFC-11	1	DALY kg-1	9.48896e-05	0.000172084	0.000266974	0.000607007	0.00087398	9.30563e-05	0.000172786	0.000265842	0.000656499	0.000922342
		C2FCl5	CFC-111	1				CFC-11	1	DALY kg-1	9.48896e-05	0.000172084	0.000266974	0.000607007	0.00087398	9.30563e-05	0.000172786	0.000265842	0.000656499	0.000922342
		C2F2Cl4	CFC-112	1				CFC-11	1	DALY kg-1	9.48896e-05	0.000172084	0.000266974	0.000607007	0.00087398	9.30563e-05	0.000172786	0.000265842	0.000656499	0.000922342
		C3FCl7	CFC-211	1				CFC-11	1	DALY kg-1	9.48896e-05	0.000172084	0.000266974	0.000607007	0.00087398	9.30563e-05	0.000172786	0.000265842	0.000656499	0.000922342
		C3F2Cl6	CFC-212	1				CFC-11	1	DALY kg-1	9.48896e-05	0.000172084	0.000266974	0.000607007	0.00087398	9.30563e-05	0.000172786	0.000265842	0.000656499	0.000922342
		C3F3Cl5	CFC-213	1				CFC-11	1	DALY kg-1	9.48896e-05	0.000172084	0.000266974	0.000607007	0.00087398	9.30563e-05	0.000172786	0.000265842	0.000656499	0.000922342
		C3F4Cl4	CFC-214	1				CFC-11	1	DALY kg-1	9.48896e-05	0.000172084	0.000266974	0.000607007	0.00087398	9.30563e-05	0.000172786	0.000265842	0.000656499	0.000922342
		C3F5Cl3	CFC-215	1				CFC-11	1	DALY kg-1	9.48896e-05	0.000172084	0.000266974	0.000607007	0.00087398	9.30563e-05	0.000172786	0.000265842	0.000656499	0.000922342
		C3F6Cl2	CFC-216	1				CFC-11	1	DALY kg-1	9.48896e-05	0.000172084	0.000266974	0.000607007	0.00087398	9.30563e-05	0.000172786	0.000265842	0.000656499	0.000922342
		C3F7Cl	CFC-217	1				CFC-11	1	DALY kg-1	9.48896e-05	0.000172084	0.000266974	0.000607007	0.00087398	9.30563e-05	0.000172786	0.000265842	0.000656499	0.000922342
	II	CCl4	Carbon tetrachloride	1.1				-		DALY kg-1	7.10997e-05	0.000128941	0.000200041	0.000454809	0.000654849	6.9726e-05	0.000129467	0.000199193	0.000491892	0.000691084
	III	CH3CCl3	Methyl chloroform	0.1				-		DALY kg-1	5.89964e-06	1.06991e-05	1.65987e-05	3.77394e-05	5.43381e-05	5.78565e-06	1.07427e-05	1.65284e-05	4.08164e-05	5.73448e-05
C	I	CHFCl2	HCFC-21	0.04				HCFC-22	0.727273	DALY kg-1	2.40902e-06	4.36879e-06	6.77781e-06	1.5412e-05	2.21898e-05	2.36248e-06	4.38661e-06	6.74909e-06	1.66687e-05	2.34178e-05
		CHF2Cl	HCFC-22	0.055				-		DALY kg-1	3.31241e-06	6.00708e-06	9.31949e-06	2.11915e-05	3.0511e-05	3.24842e-06	6.03159e-06	9.28001e-06	2.29195e-05	3.21995e-05
		CH2FCl	HCFC-31	0.02				HCFC-22	0.363636	DALY kg-1	1.20451e-06	2.18439e-06	3.38891e-06	7.70602e-06	1.10949e-05	1.18124e-06	2.1933e-06	3.37455e-06	8.33435e-06	1.17089e-05
		C2HFCl4	HCFC-121	0.01	-	0.04	0.025	HCFC-22	0.727273	DALY kg-1	2.40902e-06	4.36879e-06	6.77781e-06	1.5412e-05	2.21898e-05	2.36248e-06	4.38661e-06	6.74909e-06	1.66687e-05	2.34178e-05
		C2HF2Cl3	HCFC-122	0.02	-	0.08	0.05	HCFC-22	1.45455	DALY kg-1	4.81805e-06	8.73757e-06	1.35556e-05	3.08241e-05	4.43797e-05	4.72497e-06	8.77322e-06	1.34982e-05	3.33374e-05	4.68356e-05
		C2HF3Cl2	HCFC-123	0.02	-	0.06	0.04	HCFC-22	1.09091	DALY kg-1	3.61354e-06	6.55318e-06	1.01667e-05	2.3118e-05	3.32848e-05	3.54373e-06	6.57991e-06	1.01236e-05	2.50031e-05	3.51267e-05
		CHCl2CF3	HCFC-123	0.02				-		DALY kg-1	1.6617e-07	3.01351e-07	4.67521e-07	1.06303e-06	1.53055e-06	1.62959e-07	3.0258e-07	4.6554e-07	1.1497e-06	1.61524e-06
		C2HF4Cl	HCFC-124	0.02	-	0.04	0.03	HCFC-22	0.727273	DALY kg-1	2.40902e-06	4.36879e-06	6.77781e-06	1.5412e-05	2.21898e-05	2.36248e-06	4.38661e-06	6.74909e-06	1.66687e-05	2.34178e-05
		CHFClCF3	HCFC-124	0.022				-		DALY kg-1	1.1963e-06	2.16951e-06	3.36581e-06	7.65351e-06	1.10193e-05	1.17319e-06	2.17836e-06	3.35155e-06	8.27757e-06	1.16291e-05
		C2H2FCl3	HCFC-131	0.007	-	0.05	0.0285	HCFC-22	0.909091	DALY kg-1	3.01128e-06	5.46098e-06	8.47226e-06	1.9265e-05	2.77373e-05	2.95311e-06	5.48326e-06	8.43637e-06	2.08359e-05	2.92722e-05
		C2H2F2Cl2	HCFC-132	0.008	-	0.05	0.029	HCFC-22	0.909091	DALY kg-1	3.01128e-06	5.46098e-06	8.47226e-06	1.9265e-05	2.77373e-05	2.95311e-06	5.48326e-06	8.43637e-06	2.08359e-05	2.92722e-05
		C2H2F3Cl	HCFC-133	0.02	-	0.06	0.04	HCFC-22	1.09091	DALY kg-1	3.61354e-06	6.55318e-06	1.01667e-05	2.3118e-05	3.32848e-05	3.54373e-06	6.57991e-06	1.01236e-05	2.50031e-05	3.51267e-05
		C2H3FCl2	HCFC-141	0.005	-	0.07	0.0375	HCFC-22	1.27273	DALY kg-1	4.21579e-06	7.64538e-06	1.18612e-05	2.69711e-05	3.88322e-05	4.13435e-06	7.67657e-06	1.18109e-05	2.91702e-05	4.09811e-05
		CH3CFCl2	HCFC-141b	0.11				-		DALY kg-1	7.44447e-06	1.35007e-05	2.09451e-05	4.76247e-05	6.85699e-05	7.30065e-06	1.35557e-05	2.08564e-05	5.15079e-05	7.23643e-05
		C2H3F2Cl	HCFC-142	0.008	-	0.07	0.039	HCFC-22	1.27273	DALY kg-1	4.21579e-06	7.64538e-06	1.18612e-05	2.69711e-05	3.88322e-05	4.13435e-06	7.67657e-06	1.18109e-05	2.91702e-05	4.09811e-05
		CH3CF2Cl	HCFC-142b	0.065				-		DALY kg-1	4.82965e-06	8.7586e-06	1.35882e-05	3.08983e-05	4.44866e-05	4.73634e-06	8.79433e-06	1.35307e-05	3.34177e-05	4.69484e-05
		C2H4FCl	HCFC-151	0.003	-	0.005	0.004	HCFC-22	0.0909091	DALY kg-1	3.01128e-07	5.46098e-07	8.47226e-07	1.9265e-06	2.77373e-06	2.95311e-07	5.48326e-07	8.43637e-07	2.08359e-06	2.92722e-06
		C3HFCl6	HCFC-221	0.015	-	0.07	0.0425	HCFC-22	1.27273	DALY kg-1	4.21579e-06	7.64538e-06	1.18612e-05	2.69711e-05	3.88322e-05	4.13435e-06	7.67657e-06	1.18109e-05	2.91702e-05	4.09811e-05
		C3HF2Cl5	HCFC-222	0.01	-	0.09	0.05	HCFC-22	1.63636	DALY kg-1	5.4203e-06	9.82977e-06	1.52501e-05	3.46771e-05	4.99271e-05	5.31559e-06	9.86987e-06	1.51855e-05	3.75046e-05	5.269e-05
		C3HF3Cl4	HCFC-223	0.01	-	0.08	0.045	HCFC-22	1.45455	DALY kg-1	4.81805e-06	8.73757e-06	1.35556e-05	3.08241e-05	4.43797e-05	4.72497e-06	8.77322e-06	1.34982e-05	3.33374e-05	4.68356e-05
		C3HF4Cl3	HCFC-224	0.01	-	0.09	0.05	HCFC-22	1.63636	DALY kg-1	5.4203e-06	9.82977e-06	1.52501e-05	3.46771e-05	4.99271e-05	5.31559e-06	9.86987e-06	1.51855e-05	3.75046e-05	5.269e-05
		C3HF5Cl2	HCFC-225	0.02	-	0.07	0.045	HCFC-22	1.27273	DALY kg-1	4.21579e-06	7.64538e-06	1.18612e-05	2.69711e-05	3.88322e-05	4.13435e-06	7.67657e-06	1.18109e-05	2.91702e-05	4.09811e-05
		CF3CF2CHCl2	HCFC-225ca	0.025				HCFC-22	0.454545	DALY kg-1	1.50564e-06	2.73049e-06	4.23613e-06	9.63252e-06	1.38687e-05	1.47655e-06	2.74163e-06	4.21818e-06	1.04179e-05	1.46361e-05
		CF2ClCF2CHClF	HCFC-225cb	0.033				HCFC-22	0.6	DALY kg-1	1.98744e-06	3.60425e-06	5.59169e-06	1.27149e-05	1.83066e-05	1.94905e-06	3.61895e-06	5.568e-06	1.37517e-05	1.93197e-05
		C3HF6Cl	HCFC-226	0.02	-	0.1	0.06	HCFC-22	1.81818	DALY kg-1	6.02256e-06	1.0922e-05	1.69445e-05	3.85301e-05	5.54746e-05	5.90621e-06	1.09665e-05	1.68727e-05	4.16718e-05	5.85445e-05
		C3H2FCl5	HCFC-231	0.05	-	0.09	0.07	HCFC-22	1.63636	DALY kg-1	5.4203e-06	9.82977e-06	1.52501e-05	3.46771e-05	4.99271e-05	5.31559e-06	9.86987e-06	1.51855e-05	3.75046e-05	5.269e-05
		C3H2F2Cl4	HCFC-232	0.008	-	0.1	0.054	HCFC-22	1.81818	DALY kg-1	6.02256e-06	1.0922e-05	1.69445e-05	3.85301e-05	5.54746e-05	5.90621e-06	1.09665e-05	1.68727e-05	4.16718e-05	5.85445e-05
		C3H2F3Cl3	HCFC-233	0.007	-	0.23	0.1185	HCFC-22	4.18182	DALY kg-1	1.38519e-05	2.51205e-05	3.89724e-05	8.86192e-05	0.000127592	1.35843e-05	2.5223e-05	3.88073e-05	9.5845e-05	0.000134652
		C3H2F4Cl2	HCFC-234	0.01	-	0.28	0.145	HCFC-22	5.09091	DALY kg-1	1.68632e-05	3.05815e-05	4.74447e-05	0.000107884	0.000155329	1.65374e-05	3.07063e-05	4.72437e-05	0.000116681	0.000163925
		C3H2F5Cl	HCFC-235	0.03	-	0.52	0.275	HCFC-22	9.45455	DALY kg-1	3.13173e-05	5.67942e-05	8.81115e-05	0.000200356	0.000288468	3.07123e-05	5.70259e-05	8.77382e-05	0.000216693	0.000304431
		C3H3FCl4	HCFC-241	0.004	-	0.09	0.047	HCFC-22	1.63636	DALY kg-1	5.4203e-06	9.82977e-06	1.52501e-05	3.46771e-05	4.99271e-05	5.31559e-06	9.86987e-06	1.51855e-05	3.75046e-05	5.269e-05
		C3H3F2Cl3	HCFC-242	0.005	-	0.13	0.0675	HCFC-22	2.36364	DALY kg-1	7.82933e-06	1.41986e-05	2.20279e-05	5.00891e-05	7.2117e-05	7.67808e-06	1.42565e-05	2.19346e-05	5.41733e-05	7.61078e-05
		C3H3F3Cl2	HCFC-243	0.007	-	0.12	0.0635	HCFC-22	2.18182	DALY kg-1	7.22707e-06	1.31064e-05	2.03334e-05	4.62361e-05	6.65695e-05	7.08745e-06	1.31598e-05	2.02473e-05	5.00061e-05	7.02534e-05
		C3H3F4Cl	HCFC-244	0.009	-	0.14	0.0745	HCFC-22	2.54545	DALY kg-1	8.43158e-06	1.52908e-05	2.37223e-05	5.39421e-05	7.76645e-05	8.2687e-06	1.53531e-05	2.36218e-05	5.83405e-05	8.19623e-05
		C3H4FCl3	HCFC-251	0.001	-	0.01	0.0055	HCFC-22	0.181818	DALY kg-1	6.02256e-07	1.0922e-06	1.69445e-06	3.85301e-06	5.54746e-06	5.90621e-07	1.09665e-06	1.68727e-06	4.16718e-06	5.85445e-06
		C3H4F2Cl2	HCFC-252	0.005	-	0.04	0.0225	HCFC-22	0.727273	DALY kg-1	2.40902e-06	4.36879e-06	6.77781e-06	1.5412e-05	2.21898e-05	2.36248e-06	4.38661e-06	6.74909e-06	1.66687e-05	2.34178e-05
		C3H4F3Cl	HCFC-253	0.003	-	0.03	0.0165	HCFC-22	0.545455	DALY kg-1	1.80677e-06	3.27659e-06	5.08336e-06	1.1559e-05	1.66424e-05	1.77186e-06	3.28996e-06	5.06182e-06	1.25015e-05	1.75633e-05
		C3H5FCl2	HCFC-261	0.002	-	0.02	0.011	HCFC-22	0.363636	DALY kg-1	1.20451e-06	2.18439e-06	3.38891e-06	7.70602e-06	1.10949e-05	1.18124e-06	2.1933e-06	3.37455e-06	8.33435e-06	1.17089e-05
		C3H5F2Cl	HCFC-262	0.002	-	0.02	0.011	HCFC-22	0.363636	DALY kg-1	1.20451e-06	2.18439e-06	3.38891e-06	7.70602e-06	1.10949e-05	1.18124e-06	2.1933e-06	3.37455e-06	8.33435e-06	1.17089e-05
		C3H6FCl	HCFC-271	0.001	-	0.03	0.0155	HCFC-22	0.545455	DALY kg-1	1.80677e-06	3.27659e-06	5.08336e-06	1.1559e-05	1.66424e-05	1.77186e-06	3.28996e-06	5.06182e-06	1.25015e-05	1.75633e-05
	II	CHFBr2		1				HCFC-22	18.1818	DALY kg-1	6.02256e-05	0.00010922	0.000169445	0.000385301	0.000554746	5.90621e-05	0.000109665	0.000168727	0.000416718	0.000585445
		CHF2Br	HBFC-22B1	0.74				HCFC-22	13.4545	DALY kg-1	4.45669e-05	8.08226e-05	0.000125389	0.000285123	0.000410512	4.3706e-05	8.11523e-05	0.000124858	0.000308371	0.000433229
		CH2FBr		0.73				HCFC-22	13.2727	DALY kg-1	4.39647e-05	7.97304e-05	0.000123695	0.00028127	0.000404965	4.31154e-05	8.00556e-05	0.000123171	0.000304204	0.000427375
		C2HFBr4		0.3	-	0.8	0.55	HCFC-22	14.5455	DALY kg-1	4.81805e-05	8.73757e-05	0.000135556	0.000308241	0.000443797	4.72497e-05	8.77322e-05	0.000134982	0.000333374	0.000468356
		C2HF2Br3		0.5	-	1.8	1.15	HCFC-22	32.7273	DALY kg-1	0.000108406	0.000196595	0.000305001	0.000693541	0.000998543	0.000106312	0.000197397	0.000303709	0.000750092	0.0010538
		C2HF3Br2		0.4	-	1.6	1	HCFC-22	29.0909	DALY kg-1	9.6361e-05	0.000174751	0.000271112	0.000616481	0.000887594	9.44994e-05	0.000175464	0.000269964	0.000666748	0.000936712
		C2HF4Br		0.7	-	1.2	0.95	HCFC-22	21.8182	DALY kg-1	7.22707e-05	0.000131064	0.000203334	0.000462361	0.000665695	7.08745e-05	0.000131598	0.000202473	0.000500061	0.000702534
		C2H2FBr3		0.1	-	1.1	0.6	HCFC-22	20	DALY kg-1	6.62482e-05	0.000120142	0.00018639	0.000423831	0.000610221	6.49683e-05	0.000120632	0.0001856	0.000458389	0.000643989
		C2H2F2Br2		0.2	-	1.5	0.85	HCFC-22	27.2727	DALY kg-1	9.03384e-05	0.000163829	0.000254168	0.000577951	0.000832119	8.85932e-05	0.000164498	0.000253091	0.000625076	0.000878167
		C2H2F3Br		0.7	-	1.6	1.15	HCFC-22	29.0909	DALY kg-1	9.6361e-05	0.000174751	0.000271112	0.000616481	0.000887594	9.44994e-05	0.000175464	0.000269964	0.000666748	0.000936712
		C2H3FBr2		0.1	-	1.7	0.9	HCFC-22	30.9091	DALY kg-1	0.000102384	0.000185673	0.000288057	0.000655011	0.000943068	0.000100406	0.000186431	0.000286837	0.00070842	0.000995256
		C2H3F2Br		0.2	-	1.1	0.65	HCFC-22	20	DALY kg-1	6.62482e-05	0.000120142	0.00018639	0.000423831	0.000610221	6.49683e-05	0.000120632	0.0001856	0.000458389	0.000643989
		C2H4FBr		0.07	-	0.1	0.085	HCFC-22	1.81818	DALY kg-1	6.02256e-06	1.0922e-05	1.69445e-05	3.85301e-05	5.54746e-05	5.90621e-06	1.09665e-05	1.68727e-05	4.16718e-05	5.85445e-05
		C3HFBr6		0.3	-	1.5	0.9	HCFC-22	27.2727	DALY kg-1	9.03384e-05	0.000163829	0.000254168	0.000577951	0.000832119	8.85932e-05	0.000164498	0.000253091	0.000625076	0.000878167
		C3HF2Br5		0.2	-	1.9	1.05	HCFC-22	34.5455	DALY kg-1	0.000114429	0.000207517	0.000321946	0.000732072	0.00105402	0.000112218	0.000208364	0.000320582	0.000791763	0.00111235
		C3HF3Br4		0.3	-	1.8	1.05	HCFC-22	32.7273	DALY kg-1	0.000108406	0.000196595	0.000305001	0.000693541	0.000998543	0.000106312	0.000197397	0.000303709	0.000750092	0.0010538
		C3HF4Br3		0.5	-	2.2	1.35	HCFC-22	40	DALY kg-1	0.000132496	0.000240283	0.00037278	0.000847662	0.00122044	0.000129937	0.000241264	0.0003712	0.000916779	0.00128798
		C3HF5Br2		0.9	-	2	1.45	HCFC-22	36.3636	DALY kg-1	0.000120451	0.000218439	0.000338891	0.000770602	0.00110949	0.000118124	0.00021933	0.000337455	0.000833435	0.00117089
		C3HF6Br		0.7	-	3.3	2	HCFC-22	60	DALY kg-1	0.000198744	0.000360425	0.000559169	0.00127149	0.00183066	0.000194905	0.000361895	0.0005568	0.00137517	0.00193197
		C3H2FBr5		0.1	-	1.9	1	HCFC-22	34.5455	DALY kg-1	0.000114429	0.000207517	0.000321946	0.000732072	0.00105402	0.000112218	0.000208364	0.000320582	0.000791763	0.00111235
		C3H2F2Br4		0.2	-	2.1	1.15	HCFC-22	38.1818	DALY kg-1	0.000126474	0.000229361	0.000355835	0.000809132	0.00116497	0.00012403	0.000230297	0.000354327	0.000875107	0.00122943
		C3H2F3Br3		0.2	-	5.6	2.9	HCFC-22	101.818	DALY kg-1	0.000337263	0.00061163	0.000948894	0.00215768	0.00310658	0.000330748	0.000614125	0.000944873	0.00233362	0.00327849
		C3H2F4Br2		0.3	-	7.5	3.9	HCFC-22	136.364	DALY kg-1	0.000451692	0.000819147	0.00127084	0.00288976	0.0041606	0.000442966	0.000822489	0.00126546	0.00312538	0.00439084
		C3H2F5Br		0.9	-	1.4	1.15	HCFC-22	25.4545	DALY kg-1	8.43158e-05	0.000152908	0.000237223	0.000539421	0.000776645	8.2687e-05	0.000153531	0.000236218	0.000583405	0.000819623
		C3H3FBr4		0.08	-	1.9	0.99	HCFC-22	34.5455	DALY kg-1	0.000114429	0.000207517	0.000321946	0.000732072	0.00105402	0.000112218	0.000208364	0.000320582	0.000791763	0.00111235
		C3H3F2Br3		0.1	-	3.1	1.6	HCFC-22	56.3636	DALY kg-1	0.000186699	0.000338581	0.00052528	0.00119443	0.00171971	0.000183093	0.000339962	0.000523055	0.00129182	0.00181488
		C3H3F3Br2		0.1	-	2.5	1.3	HCFC-22	45.4545	DALY kg-1	0.000150564	0.000273049	0.000423613	0.000963252	0.00138687	0.000147655	0.000274163	0.000421818	0.00104179	0.00146361
		C3H3F4Br		0.3	-	4.4	2.35	HCFC-22	80	DALY kg-1	0.000264993	0.000480567	0.000745559	0.00169532	0.00244088	0.000259873	0.000482527	0.0007424	0.00183356	0.00257596
		C3H4FBr3		0.03	-	0.3	0.165	HCFC-22	5.45455	DALY kg-1	1.80677e-05	3.27659e-05	5.08336e-05	0.00011559	0.000166424	1.77186e-05	3.28996e-05	5.06182e-05	0.000125015	0.000175633
		C3H4F2Br2		0.1	-	1	0.55	HCFC-22	18.1818	DALY kg-1	6.02256e-05	0.00010922	0.000169445	0.000385301	0.000554746	5.90621e-05	0.000109665	0.000168727	0.000416718	0.000585445
		C3H4F3Br		0.07	-	0.8	0.435	HCFC-22	14.5455	DALY kg-1	4.81805e-05	8.73757e-05	0.000135556	0.000308241	0.000443797	4.72497e-05	8.77322e-05	0.000134982	0.000333374	0.000468356
		C3H5FBr2		0.04	-	0.4	0.22	HCFC-22	7.27273	DALY kg-1	2.40902e-05	4.36879e-05	6.77781e-05	0.00015412	0.000221898	2.36248e-05	4.38661e-05	6.74909e-05	0.000166687	0.000234178
		C3H5F2Br		0.07	-	0.8	0.435	HCFC-22	14.5455	DALY kg-1	4.81805e-05	8.73757e-05	0.000135556	0.000308241	0.000443797	4.72497e-05	8.77322e-05	0.000134982	0.000333374	0.000468356
		C3H6FBr		0.02	-	0.7	0.36	HCFC-22	12.7273	DALY kg-1	4.21579e-05	7.64538e-05	0.000118612	0.000269711	0.000388322	4.13435e-05	7.67657e-05	0.000118109	0.000291702	0.000409811
	III	CH2BrCl	Bromochloromethane	0.12				HCFC-22	2.18182	DALY kg-1	7.22707e-06	1.31064e-05	2.03334e-05	4.62361e-05	6.65695e-05	7.08745e-06	1.31598e-05	2.02473e-05	5.00061e-05	7.02534e-05
E	I	CH3Br	Methylbromide	0.6				-			7.28026e-07	1.3871e-06	2.11512e-06	4.88015e-06	6.99527e-06	7.11677e-07	1.39272e-06	2.1044e-06	5.27773e-06	7.38213e-06
Not regulated by Montreal Protocol
		N2O	Nitrous oxide	0.015	(RCP2.6)			-		DALY kg-1 N	2.24559e-06	4.0724e-06	6.318e-06	1.43666e-05	2.06846e-05	2.20221e-06	4.08902e-06	6.29123e-06	1.5538e-05	2.18293e-05
										DALY kg-1	1.42901e-06	2.59153e-06	4.02054e-06	9.14239e-06	1.31629e-05	1.40141e-06	2.6021e-06	4.00351e-06	9.88784e-06	1.38914e-05
				0.017	(RCP4.5)			-		DALY kg-1 N	2.54501e-06	4.61539e-06	7.1604e-06	1.62822e-05	2.34426e-05	2.49584e-06	4.63422e-06	7.13006e-06	1.76098e-05	2.47398e-05
										DALY kg-1	1.61955e-06	2.93707e-06	4.55662e-06	1.03614e-05	1.4918e-05	1.58826e-06	2.94905e-06	4.53731e-06	1.12062e-05	1.57435e-05
				0.0174	(RCP6.0)			-		DALY kg-1 N	2.95221e-06	5.35385e-06	8.30606e-06	1.88873e-05	2.71934e-05	2.89518e-06	5.3757e-06	8.27087e-06	2.04273e-05	2.86982e-05
										DALY kg-1	1.87868e-06	3.407e-06	5.28568e-06	1.20192e-05	1.73049e-05	1.84238e-06	3.4209e-06	5.26328e-06	1.29992e-05	1.82625e-05
				0.03	(RCP8.5)			-		DALY kg-1 N	5.90442e-06	1.07077e-05	1.66121e-05	3.77746e-05	5.43867e-05	5.79035e-06	1.07514e-05	1.65417e-05	4.08547e-05	5.73964e-05
										DALY kg-1	3.75736e-06	6.81399e-06	1.05714e-05	2.40384e-05	3.46097e-05	3.68477e-06	6.84179e-06	1.05266e-05	2.59984e-05	3.6525e-05
				*RCPs: Representative Concentration Pathways
